# Supplementary material for: Porous organic nanofiber polymers as superfast adsorbents for capturing pharmaceutical contaminants from water
Source: Royal Society of Chemistry journal article supplement (doi:10.1039/d1en01031j), 2021-12-21
Supplement: d1en01031j1.pdf [file d1en01031j1.pdf]

## Supporting Information

### **Porous Organic Nanofiber Polymers as Superfast Adsorbents for Capturing Pharmaceutical Contaminants in Water**

*Seenu Ravi,<sup>a</sup> Yujin Choi,<sup>a</sup> Shiliang Wu,<sup>b</sup> Rui Xiao,<sup>b</sup> and Youn-Sang Bae<sup>a,\*</sup>*

<sup>a</sup> Department of Chemical and Biomolecular Engineering, Yonsei University, 50 Yonsei-ro,  
Seodaemun-gu, Seoul 03722, Republic of Korea

<sup>b</sup> Key Laboratory of Energy Thermal Conversion and Control of Ministry of Education,  
School of Energy and Environment, Southeast University, Nanjing 210018, PR China

\*Corresponding author: Fax: +82-2-312-6401; Tel.: +82-2-2123-2755;

E-mail: [mowbae@yonsei.ac.kr](mailto:mowbae@yonsei.ac.kr) (Y.-S. Bae)

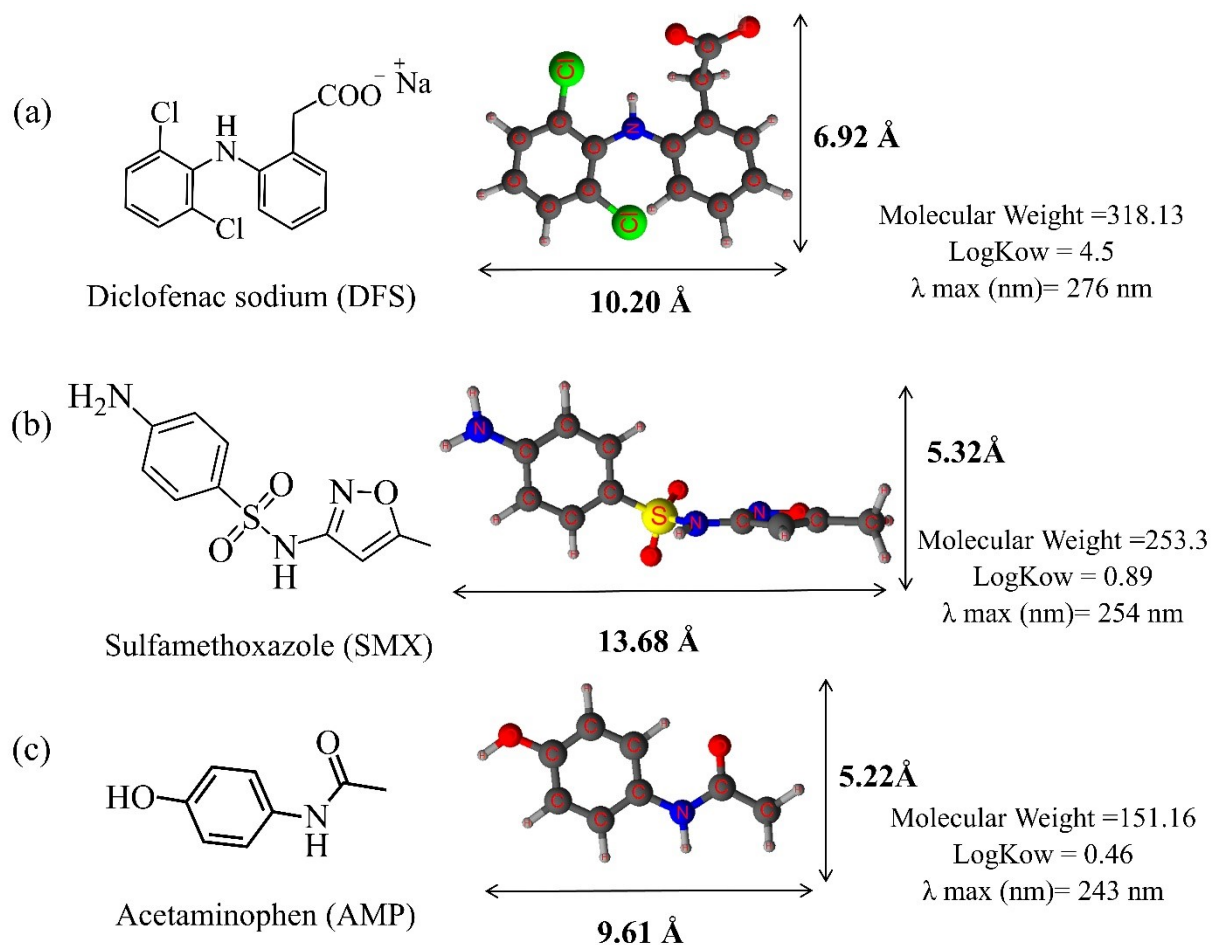

**Scheme S1.** Chemical and structural characteristics of PPCP compounds:<sup>1,2</sup> a) DFS; b) SMX; c) AMP. Optimized 3D structures drawn by ChemSketch software are also displayed along with their molecular dimensions. For DFS, Na<sup>+</sup> ion was removed considering its ionic state in aqueous solution.

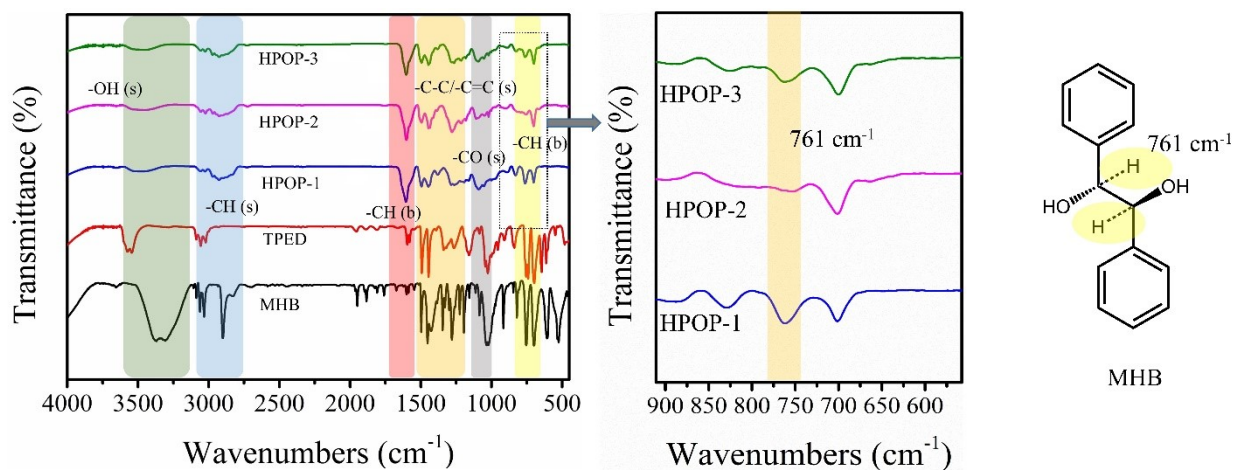

**Fig. S1.** FTIR spectra and CH bending mode vibrations of the HPOPs.

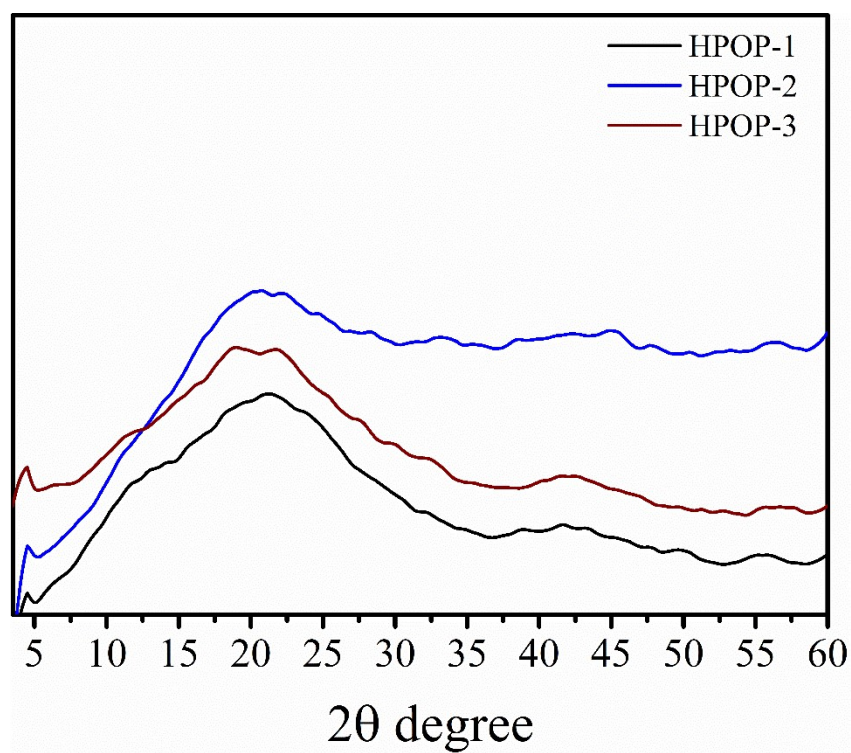

**Fig. S2.** PXRD pattern of of HPOP-1, -2, and -3

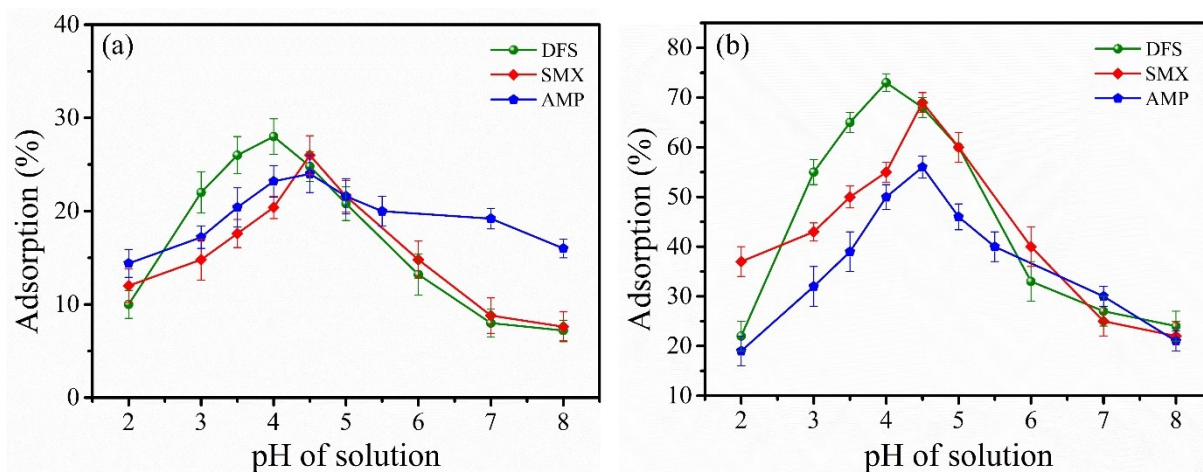

**Fig. S3.** Effect of pH on DFS, SMX, and AMP removal: (a) HPOP-1; (b) HPOP-2.

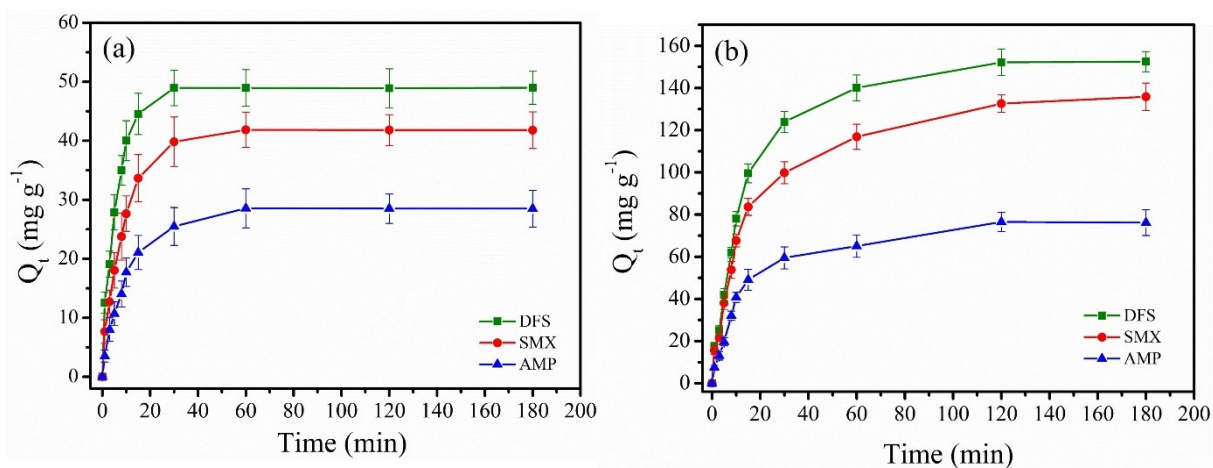

**Fig. S4.** Adsorption kinetics of DFS, SMX, and AMP on (a) HPOP-1 and (b) HPOP-2.

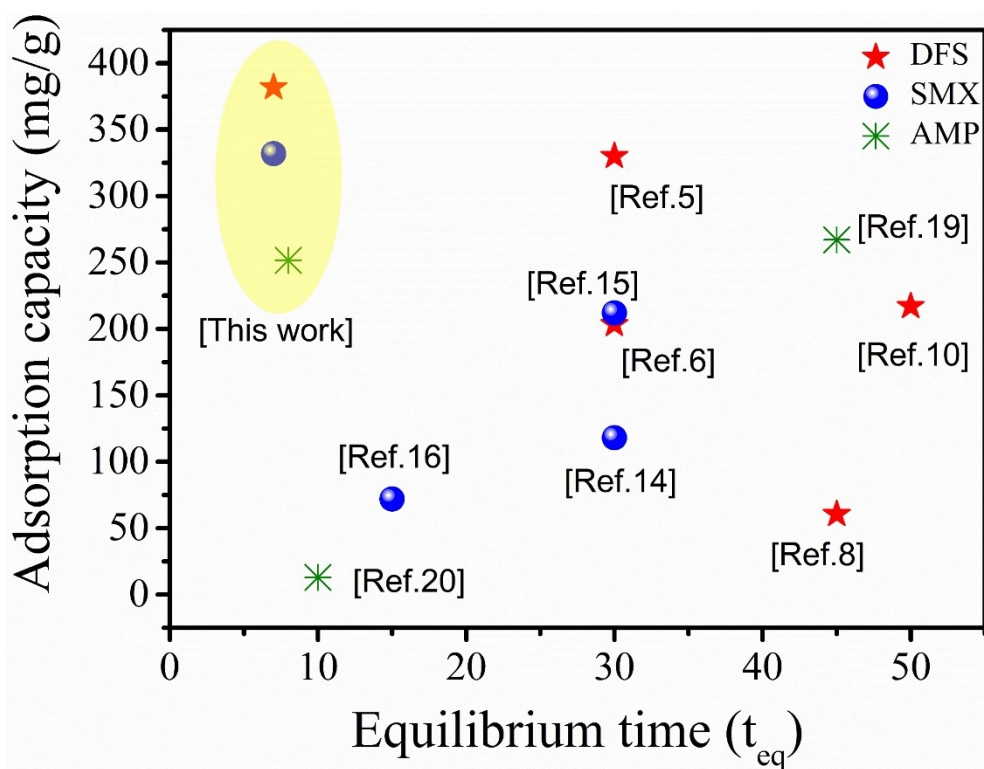

**Fig. S5.** Comparisons of equilibrium time vs. adsorption capacity for PPCP adsorption in PONF and previously reported benchmark materials. For each material, the equilibrium time ( $t_{eq}$ ) was determined to be the time to reach 95% of the saturated adsorption capacity.

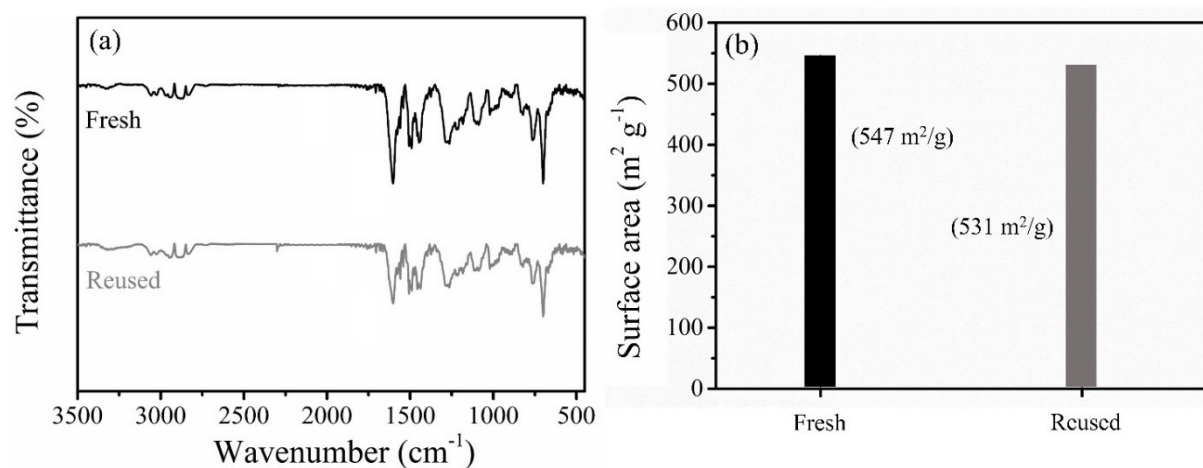

**Fig. S6.** (a) FTIR spectra and (b) BET surface areas of PONF before and after SMX adsorption.

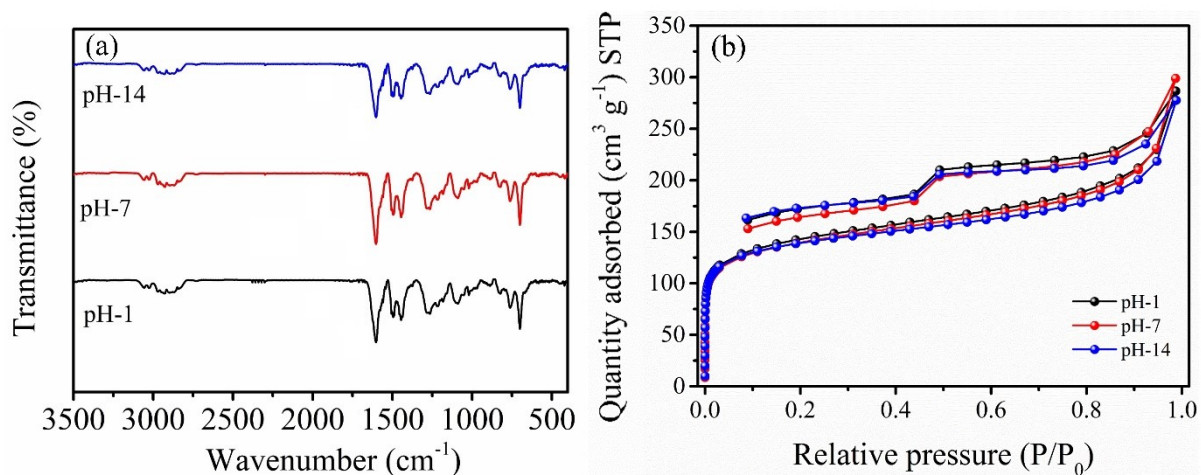

**Fig. S7.** Effect of PONF exposure to different pH conditions for 72 h: a) FTIR spectra; b) N<sub>2</sub> adsorption-desorption isotherms at 77 K.

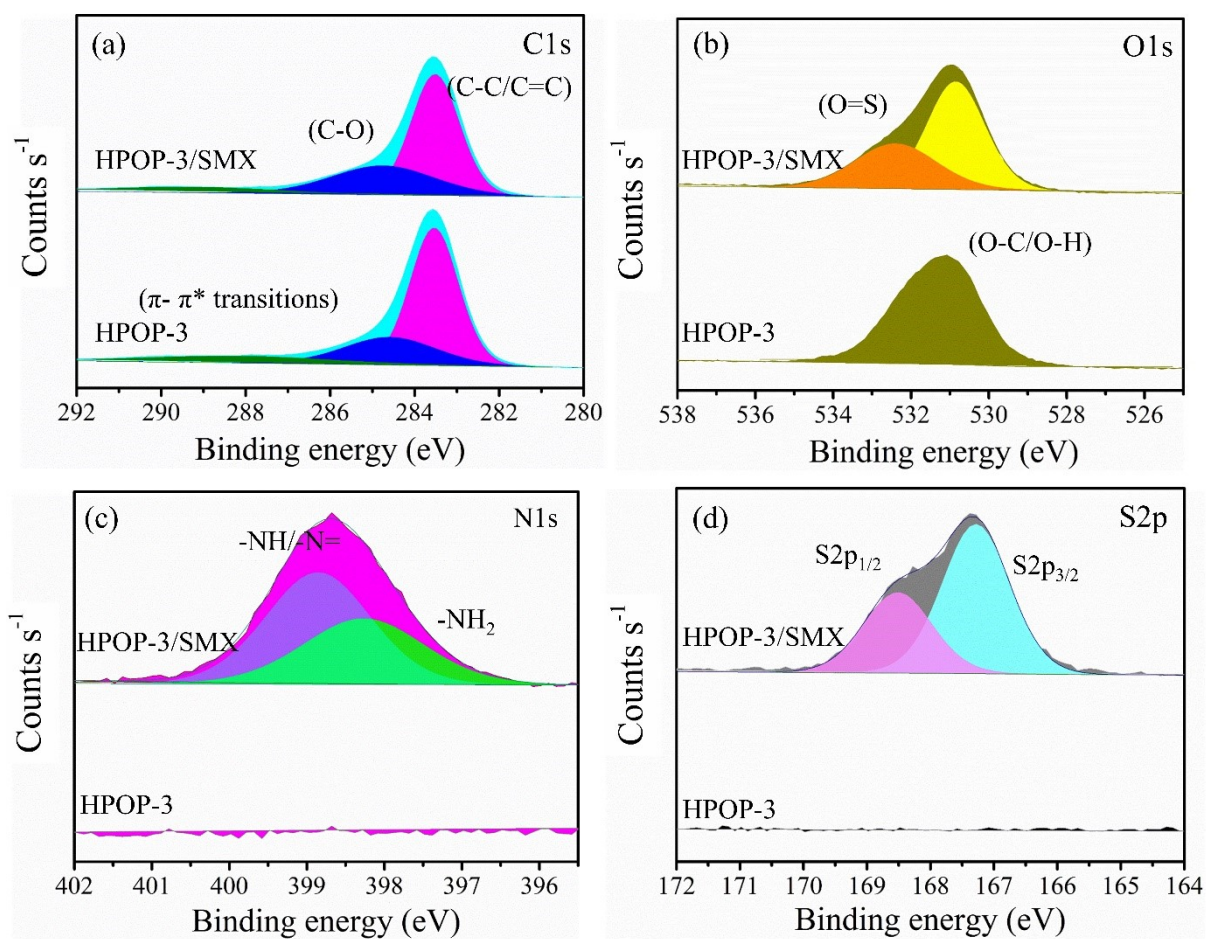

**Fig. S8.** (a) C 1s, (b) O 1s, (c) N 1s, and (d) S 2p XPS binding energy peaks of PONF before and after SMX capture.

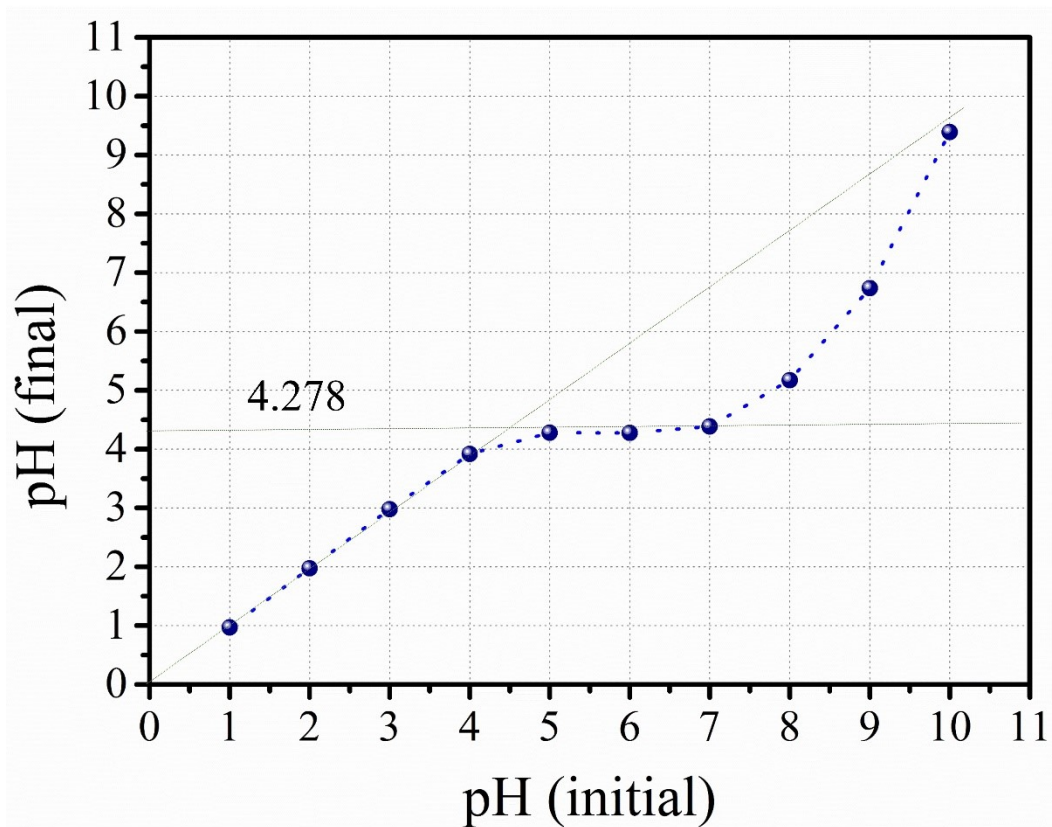

**Fig. S9.** Determination of  $pH_{pzc}$  of PONF by the pH drift method.

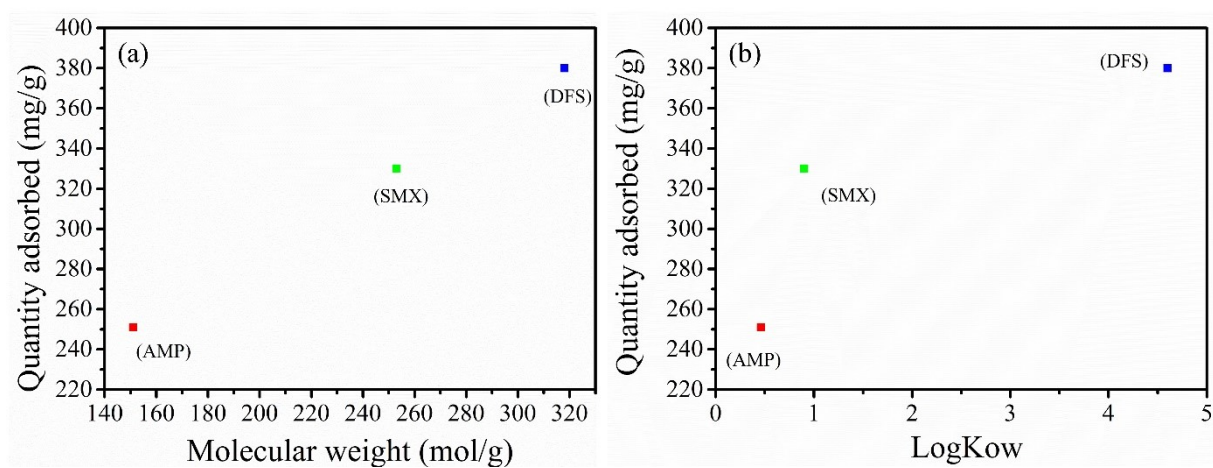

**Fig. S10.** Adsorption quantity relationship with the physicochemical characteristics of PPCP: (a) molecular weight; (b) LogKow.

**Table S1.** Equilibrium isotherm parameters of DFS, SMX, and AMP adsorption on PONF.

| PPCP | Langmuir adsorption isotherm   |                                |       | Freundlich adsorption isotherm |       |       |
|------|--------------------------------|--------------------------------|-------|--------------------------------|-------|-------|
|      | $q_m$<br>[mg.g <sup>-1</sup> ] | $K_L$<br>[L.mg <sup>-1</sup> ] | $R^2$ | $K_F$<br>[mg.g <sup>-1</sup> ] | n     | $R^2$ |
| DFS  | 380.8                          | 2.064                          | 0.979 | 186.9                          | 3.200 | 0.833 |
| SMX  | 331.9                          | 2.125                          | 0.930 | 173.5                          | 3.770 | 0.760 |
| AMP  | 251.6                          | 2.496                          | 0.932 | 144.4                          | 4.815 | 0.686 |

**Table S2.** Comparison of adsorption capacities of the various reported benchmark materials for PPCP removal from water.

| Adsorbent                          | Adsorbed amount ( $Q_m$ ) [mg g <sup>-1</sup> ] <sup>a</sup> |     |     | Adsorption mechanism                                    | Ref |
|------------------------------------|--------------------------------------------------------------|-----|-----|---------------------------------------------------------|-----|
|                                    | DFS                                                          | SMX | AMP |                                                         |     |
| ZIF-8                              | 100                                                          | -   | -   | Hydrogen bonding                                        | 3   |
| PCDM                               | 400                                                          | -   | -   | Hydrogen bonding                                        |     |
| ZCPC                               | 159.6                                                        |     |     | Anion exchange and partitioning                         | 4   |
| Expanded graphite                  | 330                                                          | -   | -   | Hydrophobicity and energetically uniform carbon surface | 5   |
| OH-MCOF                            | 203.4                                                        | -   | -   | $\pi$ - $\pi$ , hydrophobic and CH- $\pi$ interactions  | 6   |
| CNT/Al <sub>2</sub> O <sub>3</sub> | 27                                                           | -   | -   | $\pi$ - $\pi$ and van der Waals forces                  | 7   |
| CTAB-ZIF-67                        | 60.5                                                         | -   | -   | Electrostatic and Lewis acid–base interactions          | 8   |



|                                             |       |       |       |                                                                                      |           |
|---------------------------------------------|-------|-------|-------|--------------------------------------------------------------------------------------|-----------|
| Commercial AC                               | 76    | -     | -     | Electrostatic                                                                        | 9         |
| OAC                                         | 487   | -     | -     | Electrostatic and H-bonding                                                          | 9         |
| P-POP                                       | 217   | -     | -     | H-bonding, $\pi$ - $\pi$ , and van der Waals forces                                  | 10        |
| Graphene                                    | -     | 239.0 | -     | $\pi$ - $\pi$ interactions                                                           | 11        |
| MCTP                                        | -     | 483   | -     | $\pi$ - $\pi$ interactions                                                           | 12        |
| Activated carbon                            | -     | 259   | -     | -                                                                                    |           |
| Biochar                                     | -     | 19.0  | -     | Electrostatic attractions                                                            | 13        |
| Carbon PBFG4                                | -     | 118   | -     | $\pi$ - $\pi$ interactions                                                           | 14        |
| CuZnFe <sub>2</sub> O <sub>4</sub> -biochar | -     | 212   | -     | H-bonding, hydrophobic, and $\pi$ - $\pi$ electron donor-acceptor interactions       | 15        |
| PAC14-Vt                                    | -     | 72    | -     | $\pi$ - $\pi$ and NH- $\pi$ interactions                                             | 16        |
| Polymeric resin                             | -     | -     | 6.9   | Hydrogen bonds and Van der Waals forces                                              | 17        |
| Biomass-AC                                  | -     | -     | 100   | $\pi$ - $\pi$ interactions                                                           | 18        |
| Wood carbon                                 | -     | -     | 267   | Dispersive forces                                                                    | 19        |
| Graphene                                    | -     | -     | 12.98 | $\pi$ - $\pi$ interactions and Van der Waals forces                                  | 20        |
| HPOP-3 or PONF                              | 380.8 | 331.9 | 251.6 | Hydrogen bonds and hydrophobic, $\pi$ - $\pi$ interactions, and Van der Waals forces | This work |

<sup>a</sup> The amount of PPCPs adsorbed is the monolayer adsorption capacity ( $Q_m$ ) obtained from Langmuir model.

## References

1. S.-W. Nam, D.-J. Choi, S.-K. Kim, N. Her and K.-D. Zoh, Adsorption characteristics of selected hydrophilic and hydrophobic micropollutants in water using activated carbon, *Journal of Hazardous Materials*, 2014, **270**, 144-152.
2. P. Westerhoff, Y. Yoon, S. Snyder and E. Wert, Fate of Endocrine-Disruptor, Pharmaceutical, and Personal Care Product Chemicals during Simulated Drinking Water Treatment Processes, *Environmental Science & Technology*, 2005, **39**, 6649-6663.
3. B. N. Bhadra, I. Ahmed, S. Kim and S. H. Jung, Adsorptive removal of ibuprofen and diclofenac from water using metal-organic framework-derived porous carbon, *Chem Eng J*, 2017, **314**, 50-58.
4. D. Krajišnik, A. Daković, M. Milojević, A. Malenović, M. Kragović, D. B. Bogdanović, V. Dondur and J. Milić, Properties of diclofenac sodium sorption onto natural zeolite modified with cetylpyridinium chloride, *Colloids and Surfaces B: Biointerfaces*, 2011, **83**, 165-172.
5. M. D. Vedenyapina, D. A. Borisova, A. P. Simakova, L. P. Proshina and A. A. Vedenyapin, Adsorption of diclofenac sodium from aqueous solutions on expanded graphite, *Solid Fuel Chemistry*, 2013, **47**, 59-63.
6. X. Mi, S. Zhou, Z. Zhou, M. Vakili, Y. Qi, Y. Jia, D. Zhu and W. Wang, Adsorptive removal of diclofenac sodium from aqueous solution by magnetic COF: Role of hydroxyl group on COF, *Colloids and Surfaces A: Physicochemical and Engineering Aspects*, 2020, **603**, 125238.
7. H. Wei, S. Deng, Q. Huang, Y. Nie, B. Wang, J. Huang and G. Yu, Regenerable granular carbon nanotubes/alumina hybrid adsorbents for diclofenac sodium and carbamazepine removal from aqueous solution, *Water Research*, 2013, **47**, 4139-4147.
8. K.-Y. Andrew Lin, H. Yang and W.-D. Lee, Enhanced removal of diclofenac from water using a zeolitic imidazole framework functionalized with cetyltrimethylammonium bromide (CTAB), *RSC Advances*, 2015, **5**, 81330-81340.
9. B. N. Bhadra, P. W. Seo and S. H. Jung, Adsorption of diclofenac sodium from water using oxidized activated carbon, *Chem Eng J*, 2016, **301**, 27-34.
10. S. Ravi, Y. Choi and J. K. Choe, Novel phenyl-phosphate-based porous organic polymers for removal of pharmaceutical contaminants in water, *Chem Eng J*, 2020, **379**, 122290.
11. H. Chen, B. Gao and H. Li, Functionalization, pH, and ionic strength influenced sorption of sulfamethoxazole on graphene, *Journal of Environmental Chemical Engineering*, 2014, **2**, 310-315.
12. S. G. Akpe, I. Ahmed, P. Puthiaraj, K. Yu and W.-S. Ahn, Microporous organic polymers for efficient removal of sulfamethoxazole from aqueous solutions, *Micropor Mesopor Mat*, 2020, **296**, 109979.
13. F. Reguyal and A. K. Sarmah, Adsorption of sulfamethoxazole by magnetic biochar: Effects of pH, ionic strength, natural organic matter and 17 $\alpha$ -ethinylestradiol, *Science of The Total Environment*, 2018, **628-629**, 722-730.
14. V. Calisto, C. I. A. Ferreira, J. A. B. P. Oliveira, M. Otero and V. I. Esteves, Adsorptive removal of pharmaceuticals from water by commercial and waste-based carbons, *Journal of Environmental Management*, 2015, **152**, 83-90.

15. J. Heo, Y. Yoon, G. Lee, Y. Kim, J. Han and C. M. Park, Enhanced adsorption of bisphenol A and sulfamethoxazole by a novel magnetic CuZnFe<sub>2</sub>O<sub>4</sub>-biochar composite, *Bioresource Technology*, 2019, **281**, 179-187.
16. S. Guo, M. Gao, T. Shen, Y. Xiang and G. Cao, Effective adsorption of sulfamethoxazole by novel Organo-Vts and their mechanistic insights, *Micropor Mesopor Mat*, 2019, **286**, 36-44.
17. R. N. Coimbra, C. Escapa and M. Otero, Adsorption Separation of Analgesic Pharmaceuticals from Ultrapure and Waste Water: Batch Studies Using a Polymeric Resin and an Activated Carbon, *Polymers*, 2018, **10**, 958.
18. F. J. García-Mateos, R. Ruiz-Rosas, M. D. Marqués, L. M. Cotoruelo, J. Rodríguez-Mirasol and T. Cordero, Removal of paracetamol on biomass-derived activated carbon: Modeling the fixed bed breakthrough curves using batch adsorption experiments, *Chem Eng J*, 2015, **279**, 18-30.
19. I. Cabrita, B. Ruiz, A. S. Mestre, I. M. Fonseca, A. P. Carvalho and C. O. Ania, Removal of an analgesic using activated carbons prepared from urban and industrial residues, *Chem Eng J*, 2010, **163**, 249-255.
20. L. A. Al-Khateeb, S. Almotiry and M. A. Salam, Adsorption of pharmaceutical pollutants onto graphene nanoplatelets, *Chem Eng J*, 2014, **248**, 191-199.
